# Supplementary material for: High producer variant of lipoprotein lipase may protect from hepatocellular carcinoma in alcohol-associated cirrhosis
Source: PubMed Central journal article supplement — JHEP Rep. 2023 Jan 25;5(4):100684. doi: 10.1016/j.jhepr.2023.100684 (PMC9985032; doi:10.1016/j.jhepr.2023.100684), 2023-01-25
Supplement: mmc1.pdf [file mmc1.pdf]

# High producer variant of lipoprotein lipase may protect from hepatocellular carcinoma in alcohol-associated cirrhosis

Franziska Schmalz, Janett Fischer, Hamish Innes, Stephan Buch, Christine Möller, Madlen Matz-Soja, Witigo von Schönfels, Benjamin Krämer, Bettina Langhans, Alexandra Klüners, Michael Soyka, Felix Stickel, Jacob Nattermann, Christian P. Strassburg, Thomas Berg, Philipp Lutz, Hans Dieter Nischalke

## Table of contents

|                                        |   |
|----------------------------------------|---|
| UK Biobank: phenotype definitions..... | 2 |
| Table S1.....                          | 2 |
| Table S2.....                          | 3 |
| Table S3.....                          | 4 |
| Supplementary reference.....           | 4 |

## UK Biobank: phenotype definitions.

Phenotypes used in our analysis of the UK biobank cohort were defined as follows:

### HCC:

As detailed in the main text, HCC cases were identified by the presence of the ICD10:C22.0 code in a hospital admission, cause of death, or a cancer registration record, either before or after enrolment into UKB. Individuals without HCC were defined as controls

### Cirrhosis:

Cirrhosis was defined as either: a) an in-patient hospital admission for cirrhosis of the liver; or b) a cirrhosis related death. These events were identified using a validated set of International Classification of Disease (ICD) & Operations/Procedure (OPCS4) codes.[1]. See table below:

**Table S1 ICD10 and OPCS4 codes used to define cirrhosis**

| Code type                                                    | Code                | Description                                                                            |
|--------------------------------------------------------------|---------------------|----------------------------------------------------------------------------------------|
| ICD 10 (relating to hospital admission and mortality events) | K70.3               | Alcoholic cirrhosis of liver                                                           |
|                                                              | K71.7               | Toxic liver disease with fibrosis and cirrhosis of liver                               |
|                                                              | K72.1               | Chronic hepatic failure                                                                |
|                                                              | K74.4               | Secondary biliary cirrhosis                                                            |
|                                                              | K74.5               | Biliary cirrhosis, unspecified                                                         |
|                                                              | K74.6               | Other and unspecified cirrhosis of liver                                               |
|                                                              | K76.6               | Portal hypertension                                                                    |
|                                                              | I85.0; I85.9; I98.2 | Esophageal varices                                                                     |
|                                                              | I86.4               | Gastric varices                                                                        |
| OPCS4 (relating to hospital admissions only)                 | J06.1               | Transjugular intrahepatic insertion of stent into portal vein                          |
|                                                              | J06.2               | Transjugular intrahepatic insertion of stent graft into portal vein                    |
|                                                              | G10.4               | Local ligation of varices of oesophagus                                                |
|                                                              | G10.8               | Other specified open operations on varices of oesophagus                               |
|                                                              | G10.9               | Unspecified open operations on varices of oesophagus                                   |
|                                                              | G14.4               | Fibreoptic endoscopic injection sclerotherapy to varices of oesophagus                 |
|                                                              | G17.4               | Endoscopic injection sclerotherapy to varices of oesophagus using rigid oesophagoscope |
|                                                              | G43.7               | Fibreoptic endoscopic rubber band ligation of upper gastrointestinal tract varices     |
|                                                              | T46.1*              | Paracentesis abdominis for ascites                                                     |
|                                                              | T46.2*              | Drainage of ascites not elsewhere specified                                            |

ICD-10 refers to International Classification of Disease version 10. OPCS4 refers to Operation/procedure codes version 4. A hospital admission was considered to be due to cirrhosis morbidity if any of the above codes were present in the admission record. However, OPCS4:T461 and OPCS4:T462 (codes relating to ascites) are the exceptions to this rule. Here, these codes were only considered to reflect cirrhosis morbidity if accompanied by at least one corroborating ICD code for chronic liver disease (i.e. ICD10: K70-K77). This is because ascites can have non-hepatic causes.

### Type 2 diabetes (T2DM):

Although UKB participants were asked about diagnosis of diabetes mellitus (UKB Field ID: 2443), they were not asked specifically about T2DM. Thus, we inferred T2DM status by taking all individuals who reported a diabetes diagnosis (UKB Field ID: 2443), excluding those with evidence of non-type 2 diabetes. Evidence of non-type 2 diabetes was based on either: 1) self-reported type 1 diabetes in UKB nurse interview; OR; 2) hospital admission for type 1 diabetes (ICD10: E10); OR 3) self-reported gestational diabetes (UKB\_field ID: 4041).

### FIB4 index:

Fibrosis 4 (FIB4) index was calculated according to the formula:  
(age[years]\*aspartate aminotransferase[U/L])/(platelet count [10<sup>9</sup> cells/L]\*sqrt(alanine aminotransferase[U/L]))

### Other phenotypes:

All remaining phenotypes were derived directly from UKB fields. See table below.

**Table S2 UKB field IDs and web links**

| <b>Phenotype</b>             | <b>UKB field ID</b> | <b>Showcase web link</b>                                                                                                          |
|------------------------------|---------------------|-----------------------------------------------------------------------------------------------------------------------------------|
| Body mass index              | 23104               | <a href="https://biobank.ndph.ox.ac.uk/showcase/field.cgi?id=23104">https://biobank.ndph.ox.ac.uk/showcase/field.cgi?id=23104</a> |
| Alanine aminotransferase     | 23460               | <a href="https://biobank.ndph.ox.ac.uk/showcase/field.cgi?id=30620">https://biobank.ndph.ox.ac.uk/showcase/field.cgi?id=30620</a> |
| aspartate aminotransferase   | 30650               | <a href="https://biobank.ndph.ox.ac.uk/showcase/field.cgi?id=30650">https://biobank.ndph.ox.ac.uk/showcase/field.cgi?id=30650</a> |
| Cholesterol                  | 30690               | <a href="https://biobank.ndph.ox.ac.uk/showcase/field.cgi?id=30690">https://biobank.ndph.ox.ac.uk/showcase/field.cgi?id=30690</a> |
| Glycated haemoglobin (HbA1c) | 30750               | <a href="https://biobank.ndph.ox.ac.uk/showcase/field.cgi?id=30750">https://biobank.ndph.ox.ac.uk/showcase/field.cgi?id=30750</a> |
| Liver fat content            | 22436               | <a href="https://biobank.ndph.ox.ac.uk/showcase/field.cgi?id=40061">https://biobank.ndph.ox.ac.uk/showcase/field.cgi?id=40061</a> |
| Triglycerides                | 30870               | <a href="https://biobank.ndph.ox.ac.uk/showcase/field.cgi?id=30870">https://biobank.ndph.ox.ac.uk/showcase/field.cgi?id=30870</a> |

**Table S3 SNP-SNP interactions of LPL rs13702 and PNPLA3 rs738409 concerning the risk of HCC**

| Parameter                           | P     | OR    | 95% CI |       |
|-------------------------------------|-------|-------|--------|-------|
|                                     |       |       | Lower  | Upper |
| <i>LPL</i> rs13702 CC               | 0.024 | 0.123 | 0.020  | 0.754 |
| <i>PNPLA3</i> 148M                  | 0.000 | 1.658 | 1.370  | 2.006 |
| <i>LPL</i> CC by <i>PNPLA3</i> 148M | 0.129 | 1.899 | 0.830  | 4.347 |
| Constant                            | 0.000 | 0.242 |        |       |

P value for SNP-SNP interaction was calculated by the multiplicative model

### Supplementary reference

- [1] Ratib, S., Fleming, K. M., Crooks, C. J., Walker, A. J. & West, J. Causes of Death in People with Liver Cirrhosis in England Compared with the General Population: A Population-Based Cohort Study. *Am. J. Gastroenterol.* 2015;110:1149-58.
