# Supplementary material for: High producer variant of lipoprotein lipase may protect from hepatocellular carcinoma in alcohol-associated cirrhosis
Source: PubMed Central journal article supplement — JHEP Rep. 2023 Jan 25;5(4):100684. doi: 10.1016/j.jhepr.2023.100684 (PMC9985032; doi:10.1016/j.jhepr.2023.100684), 2023-01-25
Supplement: mmc2.pdf [file mmc2.pdf]

**JHEP Reports**  
**CTAT methods**

Tables for a “Complete, Transparent, Accurate and Timely account” (CTAT) are now mandatory for all revised submissions. The aim is to enhance the reproducibility of methods.

- Only include the parts relevant to your study
- Refer to the CTAT in the main text as ‘Supplementary CTAT Table’
- Do not add subheadings
- Add as many rows as needed to include all information
- Only include one item per row

**If the CTAT form is not relevant to your study, please outline the reasons why:**

**1.1 Antibodies**

| <b>Name</b>                                        | <b>Citation</b>                                                                                                                                                                | <b>Supplier</b>                                 | <b>Cat no.</b> | <b>Clone no.</b>          |
|----------------------------------------------------|--------------------------------------------------------------------------------------------------------------------------------------------------------------------------------|-------------------------------------------------|----------------|---------------------------|
| Lipoprotein lipase (LPL) mouse monoclonal antibody | Antibodypedia                                                                                                                                                                  | OriGene Technologies, Inc.<br>Rockville, US     | TA503783S      | monoclonal<br><br>OTI2C12 |
| Human/mouse lipoprotein lipase/LPL antibody        | Roberts, B., et al. 2022. Characterization of lipoprotein lipase storage vesicles in 3T3-L1 adipocytes. <i>J Cell Sci.</i>                                                     | R&D Systems<br>Minneapolis, US                  | AF7197-SP      | polyclonal                |
| Anti-Mouse IgG                                     | Ferreira, R., et al. 2006. Skeletal muscle atrophy increases cell proliferation in mice gastrocnemius during the first week of hindlimb suspension. <i>Eur J Appl Physiol.</i> | Merck<br>Darmstadt, Germany                     | A9044          | polyclonal                |
| Anti-goat IgG-HRP                                  | Wang, S., et al. 1998. Alterations of the PPP2R1B gene in human lung and colon cancer. <i>Science</i> 282: 284-287.                                                            | Santa Cruz Biotechnology<br>Heidelberg, Germany | Sc-2020        | polyclonal                |

## 1.2 Cell lines

| Name                                       | Citation                                                                                                                                                                    | Supplier                                              | Cat no.       | Passage no. | Authentication test method                        |
|--------------------------------------------|-----------------------------------------------------------------------------------------------------------------------------------------------------------------------------|-------------------------------------------------------|---------------|-------------|---------------------------------------------------|
| PLC/PRF/5 hepatoma cells                   | Shin, J., et al. 2021. Src is essential for the endosomal delivery of the FGFR4 signaling complex in hepatocellular carcinoma. <i>Journal of Translational Medicine</i> 19. | LGC Standards GmbH (Wesel, Germany)                   | ATCC-CRL-8024 | 42          | Highly-polymorphic short tandem repeat loci (STR) |
| Human hepatic sinusoidal endothelial cells | Xie, F., et al. 2016. Evaluation of Liver Ischemia-Reperfusion Injury in Rabbits Using a Nanoscale Ultrasound Contrast Agent Targeting ICAM-1. <i>PLoS One</i> 11.          | ScienCell Research Laboratories, Inc. (Carlsbad, USA) | #5000         | 10          |                                                   |
| Human hepatic stellate cells               | Reynaert, H., et al. 2002. Hepatic stellate cells: role in microcirculation and pathophysiology of portal hypertension. <i>Gut</i> 50:571-581.                              | ScienCell Research Laboratories, Inc. (Carlsbad, USA) | #5300         | 8           |                                                   |
| Primary hepatocytes                        | Soronen, J., et al., 2016. Novel hepatic microRNAs upregulated in human nonalcoholic fatty liver disease. <i>Physiol Rep.</i> 4.                                            | ScienCell Research Laboratories, Inc. (Carlsbad, USA) | #5200         | 3           |                                                   |

## 1.3 Organisms

## 1.4 Sequence based reagents

| Name    | Sequence                                                     | Supplier                                      |
|---------|--------------------------------------------------------------|-----------------------------------------------|
| LPL for | 5'-CTG CTG GCA TTG CAG GAA GTC T-3'                          | Integrated DNA Technologies (Leuven, Belgium) |
| LPL rev | 5'-GCC TTG TCT GCC TTC AGC-3'                                | Integrated DNA Technologies (Leuven, Belgium) |
| RPL19   | for: TGG GCA TAG GTA AGC GGA<br>rev: GCC TTG TCT GCC TTC AGC | Integrated DNA Technologies (Leuven, Belgium) |

## 1.5 Biological samples

| Description                                                              | Source                                                                                                                              | Supplier                  |
|--------------------------------------------------------------------------|-------------------------------------------------------------------------------------------------------------------------------------|---------------------------|
| Blood samples                                                            | Healthy patients; Patients with alcohol-associated cirrhosis with and without HCC; Patients with viral disease with and without HCC | Universitätsklinikum Bonn |
| Liver specimens from cirrhotic liver explants                            | Patients with alcohol-associated cirrhosis with and without HCC; Patients with viral disease with and without HCC                   | Universitätsklinikum Bonn |
| Tumor-free liver tissue gained by surgical resection of liver metastases | Patients with liver metastases                                                                                                      | Universitätsklinikum Bonn |

## 1.6 Deposited data

| Name of repository | Identifier | Link |
|--------------------|------------|------|
|                    |            |      |

## 1.7 Software

| Software name                        | Manufacturer                              | Version |
|--------------------------------------|-------------------------------------------|---------|
| GraphPad Prism                       | GraphPad (San Diego, USA)                 | 9       |
| IBM SPSS Statistics                  | IBM (New York, USA)                       | 24      |
| Lightcycler® 96 SW analysis software | Roche Diagnostics (Rotkreuz, Switzerland) | 1.1     |
| ImageLab Software                    | BioRad (Feldkirchen, Germany)             | 6.1     |

## 1.8 Other (e.g. drugs, proteins, vectors etc.)

| Name                  | Supplier                 |
|-----------------------|--------------------------|
| QIAamp Blood Mini Kit | Qiagen (Hilden, Germany) |

|                                                               |                                                      |
|---------------------------------------------------------------|------------------------------------------------------|
| LightSNiP (SimpleProbe) assays                                | TIB-MolBiol (Berlin, Germany)                        |
| LightSNiP reagent mix                                         | TIB-MolBiol (Berlin, Germany)                        |
| Blue Probe qPCR 2x Mix                                        | Biozym Scientific GmbH (Hessisch Oldendorf, Germany) |
| GeneJET RNA Purification Kit                                  | Thermo Scientific (Lithuania)                        |
| QuantiTect® Reverse Transcription Kit                         | Qiagen (Hilden, Germany)                             |
| Blue S'Green qPCR 2x Mix                                      | Biozym Scientific GmbH (Hessisch Oldendorf, Germany) |
| DC Protein Assay Kit                                          | Bio-Rad Laboratories GmbH (Feldkirchen, Germany)     |
| Healthcare Amersham™ ECL Prime Western-Blot detection reagent | Fisher Scientific GmbH (Schwerte, Germany)           |

**1.9 Please provide the details of the corresponding methods author for the manuscript:**

Dr. rer. Nat. Hans Dieter Nischalke  
 Medizinische Klinik und Poliklinik I  
 Immunologisches Labor, BMZ  
 Gebäude 13, Raum 3G006  
 Venusberg-Campus 1, 53105 Bonn  
 Tel: 0228 287 51416

M.Sc. Franziska Schmalz  
 Medizinische Klinik und Poliklinik I  
 Immunologisches Labor, BMZ  
 Gebäude 13, Raum 3G006  
 Venusberg-Campus 1, 53105 Bonn  
 Tel: 0228 287 51497

**2.0 Please confirm for randomised controlled trials all versions of the clinical protocol are included in the submission. These will be published online as supplementary information.**
